# Supplementary material for: Pronounced Effects of Acute Endurance Exercise on Gene Expression in Resting and Exercising Human Skeletal Muscle
Source: PubMed Central journal article supplement (PMC3511348; doi:10.1371/journal.pone.0051066), 2012-11-30
Supplement: pone.0051066.s005.pdf [file pone.0051066.s005.pdf]

**Supplementary table 1** List of differentially expressed genes at baseline (T0) in exercising and non-exercising leg

| Gene name    | Mean FC  | P value | FDR value |
|--------------|----------|---------|-----------|
| XPOT         | -1.28545 | 0.0014  | 0.99962   |
| PROCR        | 1.17887  | 0.0038  | 0.99962   |
| C3orf71      | 1.191506 | 0.0049  | 0.99962   |
| BANP         | 1.22251  | 0.0052  | 0.99962   |
| MALL         | 1.283441 | 0.0088  | 0.99962   |
| SPRR4        | 1.250174 | 0.0094  | 0.99962   |
| LOC100505587 | 1.150362 | 0.0096  | 0.99962   |
| THAP5        | 1.230518 | 0.0098  | 0.99962   |
